# Supplementary material for: Clustering analysis of proteins from microbial genomes at multiple levels of resolution
Source: PubMed Central journal article supplement (PMC5009818; doi:10.1186/s12859-016-1112-8), 2016-08-31
Supplement: 12859_2016_1112_MOESM1_ESM.pdf [file 12859_2016_1112_MOESM1_ESM.pdf]

**Table S1 Per-clade statistics for 131 abundant clades; number of proteins represents non-redundant set of non-identical protein sequences**

| Clade Id | Taxonomic content                                 | No. annotated genomes | No. nonclonal annotated genomes | No. protein coding regions | No. protein sequences | No. conservative include clusters |
|----------|---------------------------------------------------|-----------------------|---------------------------------|----------------------------|-----------------------|-----------------------------------|
| 19668    | Escherichia, Shigella                             | 2277                  | 929                             | 3303114                    | 310023                | 3894                              |
| 19507    | Acinetobacter                                     | 749                   | 280                             | 774670                     | 133653                | 3034                              |
| 19252    | Helicobacter pylori                               | 309                   | 216                             | 254806                     | 191419                | 1244                              |
| 20139    | Enterococcus genus                                | 242                   | 155                             | 306721                     | 33249                 | 2106                              |
| 20104    | Streptococcus genus                               | 347                   | 139                             | 163066                     | 61589                 | 1394                              |
| 20137    | Enterococcus genus                                | 300                   | 139                             | 309061                     | 45809                 | 2314                              |
| 19669    | Salmonella, Citrobacter                           | 638                   | 134                             | 478093                     | 112833                | 3940                              |
| 19672    | Enterobacter, Escherichia, Klebsiella             | 350                   | 132                             | 593750                     | 84168                 | 4726                              |
| 19537    | Pseudomonas                                       | 229                   | 118                             | 622138                     | 100992                | 5511                              |
| 21194    | Vibrio                                            | 271                   | 118                             | 433416                     | 150390                | 4015                              |
| 19400    | Neisseria genus                                   | 204                   | 109                             | 162808                     | 29688                 | 1596                              |
| 19988    | Staphylococcus aureus                             | 3827                  | 108                             | 235562                     | 43260                 | 2309                              |
| 20122    | Streptococcus agalactiae                          | 285                   | 103                             | 165898                     | 17943                 | 1704                              |
| 19671    | Enterobacter Lelliottia                           | 80                    | 70                              | 229896                     | 102783                | 3476                              |
| 20021    | Bacillus                                          | 101                   | 70                              | 250224                     | 101171                | 3919                              |
| 20103    | Streptococcus suis                                | 92                    | 69                              | 97200                      | 48055                 | 1541                              |
| 19543    | Pseudomonas                                       | 108                   | 68                              | 219354                     | 114229                | 3551                              |
| 19270    | Campylobacter jejuni                              | 97                    | 63                              | 85618                      | 29112                 | 1444                              |
| 20116    | Streptococcus mutans                              | 165                   | 62                              | 100740                     | 28671                 | 1672                              |
| 19993    | Staphylococcus genus                              | 92                    | 59                              | 114655                     | 23197                 | 2014                              |
| 22045    | Bacillus                                          | 72                    | 57                              | 204004                     | 91370                 | 3981                              |
| 20571    | Bacteroides genus                                 | 85                    | 56                              | 167823                     | 43178                 | 3185                              |
| 19639    | Vibrio genus                                      | 213                   | 53                              | 150864                     | 58764                 | 3075                              |
| 21655    | Pseudomonas                                       | 48                    | 47                              | 122624                     | 96684                 | 2993                              |
| 19182    | Prochlorococcus genus                             | 47                    | 45                              | 44826                      | 17488                 | 1395                              |
| 19542    | Acinetobacter, Pseudomonas                        | 46                    | 45                              | 138121                     | 82184                 | 3542                              |
| 19673    | Enterobacter, Escherichia, Klebsiella, Raoultella | 55                    | 45                              | 146076                     | 56173                 | 3531                              |
| 23492    | Campylobacter coli                                | 51                    | 44                              | 61804                      | 14001                 | 1476                              |
| 20999    | Leptospira interrogans                            | 179                   | 43                              | 131118                     | 31445                 | 3318                              |
| 20126    | Streptococcus pyogenes                            | 215                   | 42                              | 57716                      | 18901                 | 1440                              |
| 20175    | Peptoclostridium difficile                        | 180                   | 42                              | 133154                     | 37178                 | 3307                              |
| 20096    | Lactobacillus casei group                         | 52                    | 41                              | 83601                      | 21892                 | 2282                              |
| 22620    | Mesorhizobium genus                               | 46                    | 40                              | 175832                     | 81221                 | 4898                              |
| 19460    | Burkholderia                                      | 73                    | 38                              | 133070                     | 40860                 | 4026                              |
| 20017    | Listeria genus                                    | 270                   | 35                              | 81704                      | 32042                 | 2559                              |
| 20877    | Salinispora arenicola                             | 43                    | 35                              | 140603                     | 49658                 | 4145                              |
| 19546    | Pseudomonas                                       | 35                    | 32                              | 84606                      | 66824                 | 2848                              |
| 19908    | Ensifer, Sinorhizobium                            | 33                    | 32                              | 140617                     | 48789                 | 4907                              |
| 20774    | Gardnerella vaginalis                             | 35                    | 32                              | 16826                      | 9731                  | 613                               |
| 20876    | Salinispora pacifica                              | 37                    | 29                              | 97783                      | 57875                 | 3618                              |
| 19710    | Haemophilus genus                                 | 30                    | 28                              | 34703                      | 23136                 | 1377                              |
| 20574    | Bacteroides genus                                 | 30                    | 26                              | 54310                      | 30107                 | 2364                              |
| 20777    | Bifidobacterium genus                             | 29                    | 26                              | 35205                      | 14218                 | 1446                              |
| 19619    | Aeromonas genus                                   | 25                    | 25                              | 70424                      | 48869                 | 3272                              |
| 20131    | Lactococcus lactis                                | 26                    | 24                              | 33477                      | 14869                 | 1537                              |
| 19624    | Vibrio genus                                      | 26                    | 23                              | 75313                      | 42608                 | 3499                              |
| 20898    | Streptomyces                                      | 36                    | 23                              | 81586                      | 53296                 | 3906                              |
| 21132    | Rhizobium genus                                   | 23                    | 23                              | 116850                     | 79796                 | 5377                              |
| 19440    | Bordetella genus                                  | 84                    | 22                              | 86637                      | 28395                 | 4391                              |
| 19512    | Acinetobacter                                     | 26                    | 22                              | 55878                      | 41612                 | 2671                              |
| 20019    | Bacillus cereus                                   | 25                    | 22                              | 91444                      | 44235                 | 4400                              |
| 20836    | Mycobacterium                                     | 71                    | 22                              | 89086                      | 32179                 | 4227                              |
| 21001    | Leptospira genus                                  | 23                    | 22                              | 62885                      | 21383                 | 2941                              |
| 19355    | Legionella pneumophila                            | 31                    | 21                              | 51136                      | 26297                 | 2557                              |
| 19487    | Xanthomonas                                       | 85                    | 21                              | 64213                      | 34578                 | 3342                              |
| 19660    | Pantoea genus                                     | 21                    | 21                              | 47932                      | 25806                 | 2513                              |
| 19678    | Cronobacter genus                                 | 25                    | 21                              | 54225                      | 30474                 | 3026                              |
| 20087    | Lactobacillus genus                               | 21                    | 21                              | 46388                      | 18311                 | 2451                              |
| 20112    | Streptococcus genus                               | 23                    | 21                              | 38420                      | 24914                 | 1899                              |
| 20200    | Clostridium genus                                 | 33                    | 21                              | 48766                      | 28129                 | 2714                              |
| 21018    | Borrelia burgdorferi group                        | 29                    | 20                              | 17156                      | 7078                  | 919                               |
| 22103    | Bacillus                                          | 33                    | 20                              | 64650                      | 34772                 | 3353                              |
| 35018    | Vibrio                                            | 22                    | 20                              | 65752                      | 32410                 | 3469                              |
| 19463    | Burkholderia                                      | 23                    | 19                              | 67009                      | 55341                 | 3901                              |
| 19599    | Pseudoalteromonas                                 | 21                    | 19                              | 43596                      | 30425                 | 2564                              |
| 20045    | Oenococcus oeni                                   | 56                    | 19                              | 26363                      | 7950                  | 1484                              |
| 20580    | Bacteroides, Porphyromonas                        | 21                    | 19                              | 44654                      | 18582                 | 2633                              |
| 20114    | Streptococcus genus                               | 46                    | 18                              | 23252                      | 9315                  | 1438                              |
| 19485    | Stenotrophomonas                                  | 16                    | 16                              | 48324                      | 37422                 | 3211                              |
| 19970    | Paenibacillus genus                               | 14                    | 16                              | 51872                      | 39434                 | 3482                              |
| 20042    | Bacillus                                          | 28                    | 16                              | 52570                      | 37376                 | 3468                              |
| 20794    | Corynebacterium diphtheriae                       | 17                    | 16                              | 28326                      | 14360                 | 1841                              |
| 21015    | Borrelia burgdorferi group                        | 21                    | 16                              | 3414                       | 1691                  | 245                               |
| 19214    | Microcystis genus                                 | 15                    | 15                              | 36177                      | 28475                 | 2552                              |
| 19920    | Mesorhizobium genus                               | 15                    | 15                              | 56891                      | 48692                 | 4069                              |
| 20026    | Geobacillus                                       | 17                    | 15                              | 35426                      | 20704                 | 2569                              |
| 20118    | Streptococcus genus                               | 14                    | 15                              | 15101                      | 9871                  | 1060                              |
| 22238    | Streptomyces genus                                | 32                    | 15                              | 76934                      | 41168                 | 5741                              |
| 19709    | Aggregatibacter genus                             | 24                    | 14                              | 14803                      | 10064                 | 1185                              |
| 20057    | Lactobacillus genus                               | 16                    | 14                              | 12895                      | 5583                  | 986                               |
| 20097    | Lactobacillus                                     | 23                    | 14                              | 27056                      | 12972                 | 2127                              |
| 21126    | Citrobacter, Escherichia                          | 17                    | 14                              | 51376                      | 27346                 | 3785                              |
| 22164    | Rhodococcus genus                                 | 15                    | 14                              | 48846                      | 32668                 | 3771                              |
| 19545    | Pseudomonas                                       | 13                    | 13                              | 39524                      | 28426                 | 3282                              |
| 19684    | Yersinia                                          | 126                   | 13                              | 41072                      | 9810                  | 3334                              |
| 20120    | Streptococcus genus                               | 14                    | 13                              | 16770                      | 12555                 | 1406                              |
| 20231    | Veillonella genus                                 | 13                    | 13                              | 14146                      | 10428                 | 1205                              |
| 21108    | Yersinia genus                                    | 24                    | 13                              | 34994                      | 27761                 | 2871                              |
| 22137    | Xanthomonas genus                                 | 19                    | 13                              | 27618                      | 19417                 | 2307                              |
| 35123    | Fusobacterium genus                               | 13                    | 13                              | 19379                      | 13100                 | 1591                              |
| 19472    | Ralstonia solanacearum                            | 12                    | 12                              | 34257                      | 24562                 | 3133                              |
| 19631    | Vibrio                                            | 14                    | 12                              | 43364                      | 28967                 | 3827                              |
| 19697    | Actinobacillus genus                              | 19                    | 12                              | 19103                      | 11804                 | 1696                              |
| 20059    | Lactobacillus genus                               | 13                    | 12                              | 13251                      | 7993                  | 1172                              |
| 20185    | Clostridium perfringens                           | 12                    | 12                              | 28189                      | 16443                 | 2479                              |
| 20301    | Clostridium, Lachnospirillum                      | 17                    | 12                              | 32578                      | 14075                 | 2846                              |
| 20374    | Sulfolobus islandicus                             | 20                    | 12                              | 25395                      | 10208                 | 2197                              |
| 20491    | Fusobacterium genus                               | 14                    | 12                              | 18805                      | 11903                 | 1646                              |
| 20568    | Porphyromonas genus                               | 13                    | 12                              | 16736                      | 10492                 | 1439                              |
| 21634    | Thioalkalivibrio genus                            | 13                    | 12                              | 26900                      | 16976                 | 2296                              |
| 21993    | unclassified Cloacimonetes                        | 12                    | 12                              | 5911                       | 814                   | 643                               |
| 22787    | Streptomyces genus                                | 14                    | 12                              | 28777                      | 26452                 | 2532                              |
| 23775    | Leptospira genus                                  | 25                    | 12                              | 35794                      | 15445                 | 3053                              |
| 34963    | Prochlorococcus genus                             | 12                    | 12                              | 13566                      | 6026                  | 1327                              |
| 19500    | Acinetobacter genus                               | 14                    | 11                              | 25318                      | 15564                 | 2403                              |
| 19587    | Alteromonas genus                                 | 13                    | 11                              | 25976                      | 16327                 | 2465                              |
| 19601    | Colwellia, Pseudoalteromonas                      | 11                    | 11                              | 26017                      | 16837                 | 2679                              |
| 19706    | Pasteurella genus                                 | 21                    | 11                              | 18246                      | 9952                  | 1815                              |
| 20066    | Lactobacillus genus                               | 10                    | 11                              | 12290                      | 6465                  | 1193                              |
| 20068    | Lactobacillus delbrueckii                         | 11                    | 11                              | 12198                      | 8403                  | 1182                              |
| 20136    | Enterococcus genus                                | 12                    | 11                              | 21162                      | 13391                 | 2288                              |
| 20829    | Mycobacterium tuberculosis                        | 1737                  | 11                              | 36314                      | 13409                 | 3536                              |
| 20861    | Rhodococcus genus                                 | 12                    | 11                              | 51809                      | 30774                 | 5119                              |
| 20904    | Streptomyces                                      | 12                    | 11                              | 55332                      | 34925                 | 5306                              |
| 21006    | Leptospira genus                                  | 12                    | 11                              | 26923                      | 15137                 | 2629                              |
| 21637    | Thioalkalivibrio genus                            | 14                    | 11                              | 24747                      | 15193                 | 2322                              |
| 21976    | Acinetobacter genus                               | 15                    | 11                              | 19021                      | 13866                 | 1796                              |
| 21985    | Acinetobacter                                     | 13                    | 11                              | 32027                      | 24974                 | 3030                              |
| 35088    | Streptomyces                                      | 11                    | 11                              | 38402                      | 31338                 | 3620                              |
| 19471    | Ralstonia                                         | 12                    | 10                              | 34594                      | 20370                 | 3664                              |
| 19611    | Shewanella genus                                  | 9                     | 10                              | 21595                      | 16135                 | 2257                              |
| 19680    | Pectobacterium genus                              | 10                    | 10                              | 30432                      | 22718                 | 3143                              |
| 20037    | Bacillus genus                                    | 11                    | 10                              | 29666                      | 22850                 | 3094                              |
| 20063    | Lactobacillus crispatus                           | 10                    | 10                              | 14026                      | 5356                  | 1506                              |
| 20107    | Streptococcus genus                               | 10                    | 10                              | 14364                      | 11618                 | 1499                              |
| 20125    | Streptococcus                                     | 10                    | 10                              | 12091                      | 7568                  | 1324                              |
| 20130    | Lactococcus garvieae                              | 13                    | 10                              | 14383                      | 8728                  | 1522                              |
| 20831    | Mycobacterium avium                               | 32                    | 10                              | 28359                      | 12951                 | 3091                              |
| 20998    | Leptospira genus                                  | 10                    | 10                              | 26944                      | 16321                 | 2889                              |
| 21023    | Treponema denticola                               | 17                    | 10                              | 19239                      | 14000                 | 2000                              |
| 23759    | Salinispora genus                                 | 11                    | 10                              | 39931                      | 12983                 | 4063                              |
